# Supplementary material for: Activity in primate visual cortex is minimally driven by spontaneous movements
Source: Springer Nature journal article supplement (doi:10.1038/s41593-023-01459-5), 2023-10-12
Supplement: MOESM1 [file 41593_2023_1459_MOESM1_ESM.pdf]

---

# Activity in primate visual cortex is minimally driven by spontaneous movements

---

In the format provided by the  
authors and unedited

| Threshold (% ΔVE) | Controlled Retinal input | Uncontrolled retinal input | P-value (c <sup>2</sup> test) |
|-------------------|--------------------------|----------------------------|-------------------------------|
| All areas         |                          |                            |                               |
| 0                 | 549/900; 61%             | 768/900; 85%               | < 10 <sup>-16</sup>           |
| 0.05              | 172/900; 19%             | 697/900; 77%               | < 10 <sup>-16</sup>           |
| 0.1               | 48/900; 5%               | 606/900; 67%               | < 10 <sup>-16</sup>           |
| 0.5               | 1/900; 0.1%              | 252/900; 28%               | < 10 <sup>-16</sup>           |
| 1                 | 0/900; 0%                | 125/900; 14%               | < 10 <sup>-16</sup>           |
| V1                |                          |                            |                               |
| 0                 | 159/293; 54%             | 281/293; 96%               | < 10 <sup>-16</sup>           |
| 0.05              | 42/293; 14%              | 268/293; 91%               | < 10 <sup>-16</sup>           |
| 0.1               | 15/293; 5%               | 246/293; 84%               | < 10 <sup>-16</sup>           |
| 0.5               | 1/293; 0.3%              | 132/293; 45%               | < 10 <sup>-16</sup>           |
| 1                 | 0/293; 0%                | 67/293; 23%                | < 10 <sup>-16</sup>           |
| V2                |                          |                            |                               |
| 0                 | 160/251; 64%             | 168/251; 67%               | 0.45                          |
| 0.05              | 59/251; 24%              | 145/251; 58%               | 10 <sup>-15</sup>             |
| 0.1               | 16/251; 6%               | 131/251; 52%               | < 10 <sup>-16</sup>           |
| 0.5               | 0/251; 0%                | 35/251; 23%                | 10 <sup>-9</sup>              |
| 1                 | 0/251; 0%                | 15/251; 6%                 | 10 <sup>-4</sup>              |
| V3/V3A            |                          |                            |                               |
| 0                 | 211/312; 68%             | 277/312; 89%               | 10 <sup>-10</sup>             |
| 0.05              | 64/312; 20%              | 242/312; 78%               | < 10 <sup>-16</sup>           |
| 0.1               | 13/312; 4%               | 191/312; 61%               | < 10 <sup>-16</sup>           |
| 0.5               | 0/312; 0%                | 61/312; 20%                | 10 <sup>-16</sup>             |
| 1                 | 0/312; 0%                | 28/312; 9%                 | 10 <sup>-9</sup>              |

**Supplementary Table 1**

**Results are robust to varying thresholds of unique variance explained by movements to classify neurons as modulated by movements.** Proportion of units for which the unique variance of movements (Fig 2E) exceeds different thresholds of unique variance. P-values compare the proportions between controlled and uncontrolled retinal input epochs using a two-sided chi-square test, uncorrected for multiple comparisons.
